# Supplementary material
Source: PubMed Central journal article supplement (PMC3163952)
Supplement: JCI45709sd.pdf [file JCI45709sd.pdf]

# **Enhancement of Proteasomal Function Protects Against Cardiac Proteinopathy and Ischemia/Reperfusion Injury in Mice**

Jie Li<sup>1</sup>, Kathleen M. Horak<sup>1</sup>, Huabo Su<sup>1</sup>, Atsushi Sanbe<sup>2</sup>, Jeffrey Robbins<sup>2</sup>, Xuejun Wang<sup>1</sup>

<sup>1</sup>Division of Basic Biomedical Sciences (J.L., K.M.H., X.W.), Sanford School of Medicine of the University of South Dakota, Vermillion, SD, USA;

<sup>2</sup>The Heart Institute (A.S., J.R.), Cincinnati Children's Hospital Medical Center, Cincinnati, OH, USA

**Online Supplementary Data**

## Supplementary Figures and Legends

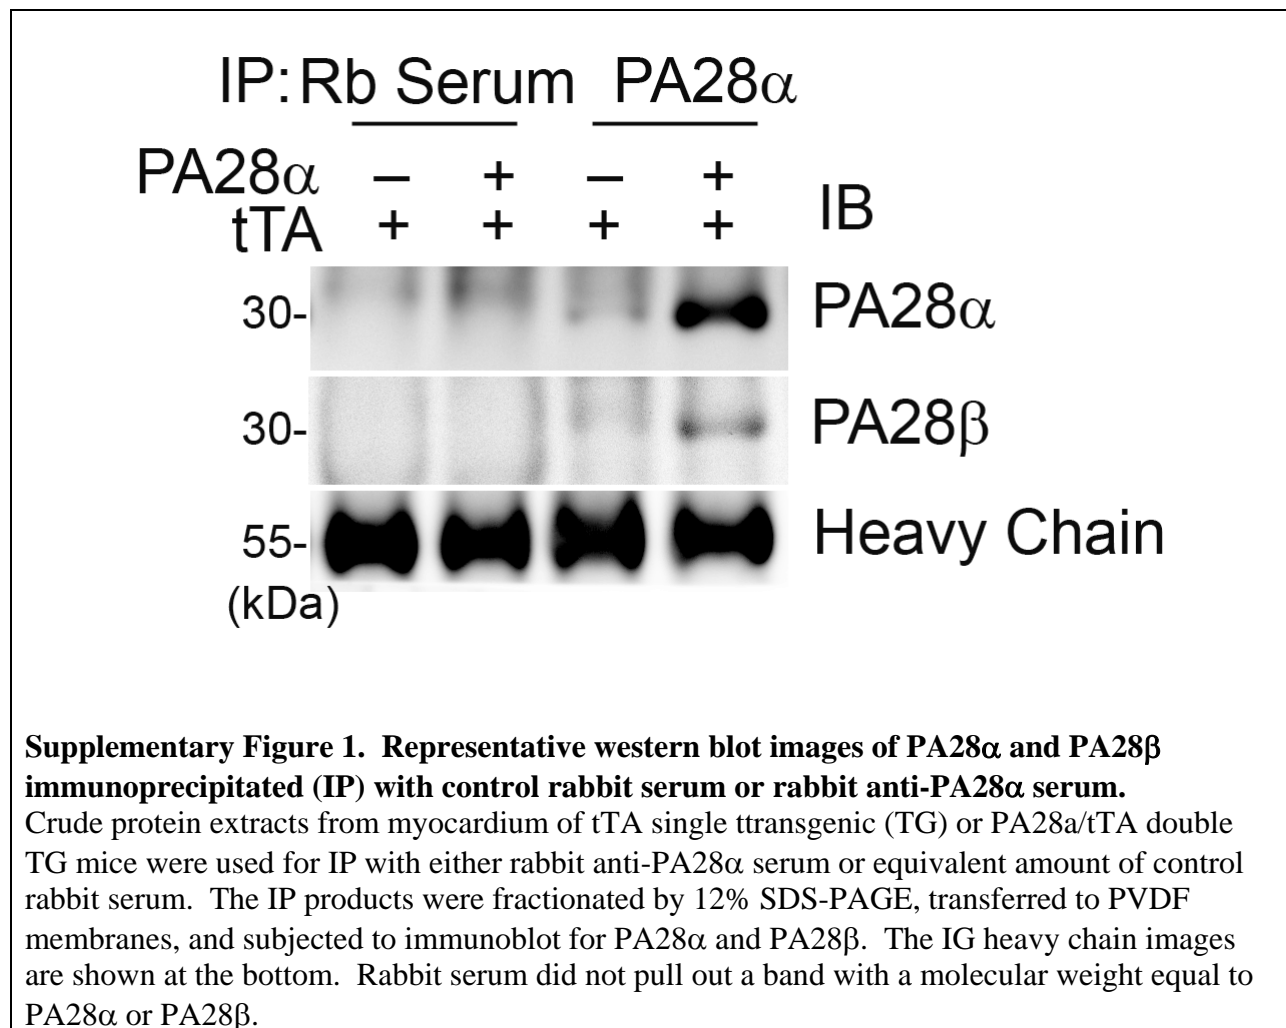

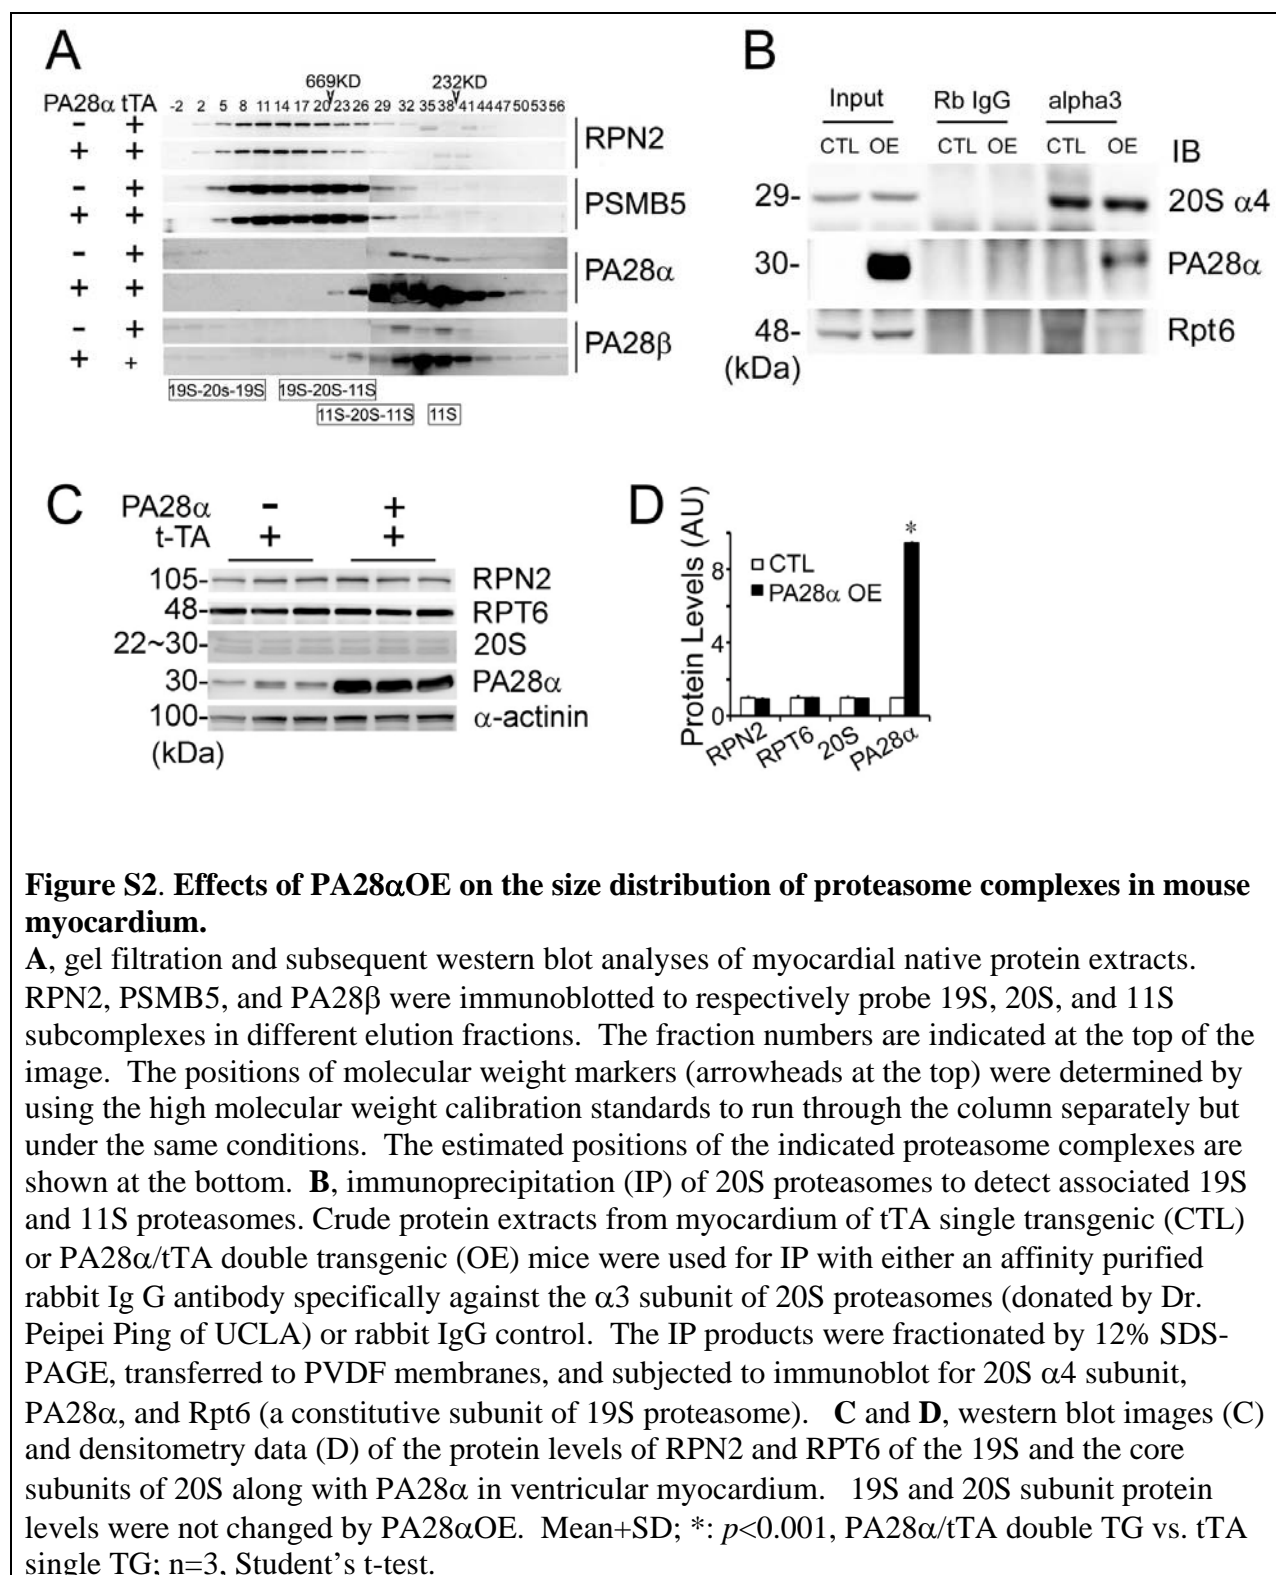

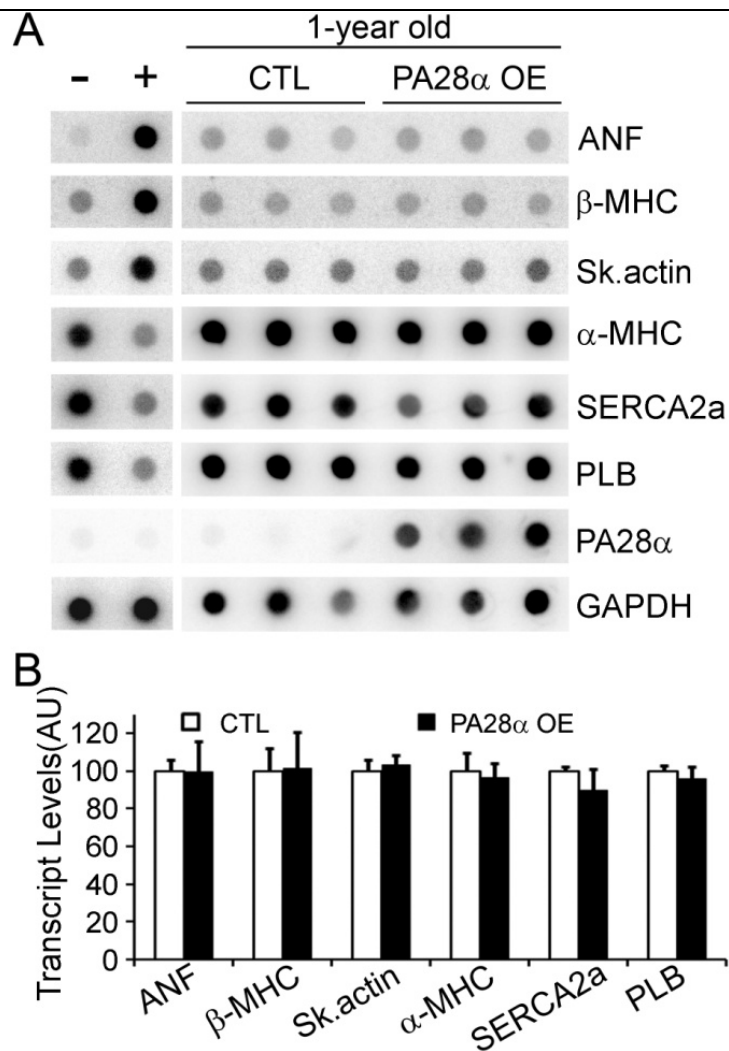

**Figure S3. PA28 $\alpha$ OE did not change the fetal gene expression profile.** RNA dot blot images (A) and densitometric analysis (B) of the fetal gene panel in 1-year old tTA TG (CTL) and PA28 $\alpha$ /tTA double TG (PA28 $\alpha$ OE) mouse hearts were presented. A pair of RNA samples from normal (-) and known cardiomyopathic (+) mouse ventricles were included in the profiling for validating the method used. N=3, Student's t-test,  $p > 0.05$ .

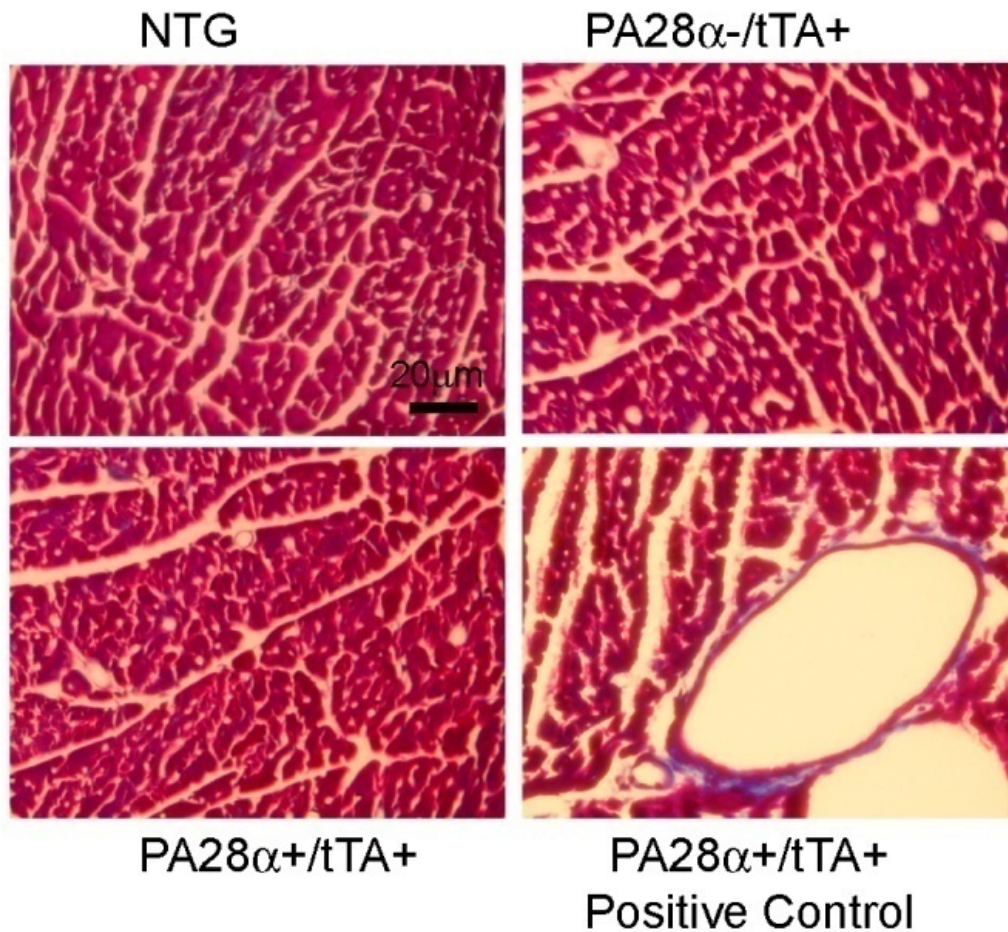

**Figure S4. Representative micrographs of trichrome-stained myocardium.** Trichrome staining of ventricular tissue samples from 1-year old mice. NTG, tTA TG, or PA28 $\alpha$ /tTA double TG genotypes were analyzed. No discernable fibrosis was evident in the myocardial interstitium. The bottom right panel is a positive control from a PA28 $\alpha$ /tTA double TG mouse which shows the blue vessel wall staining.

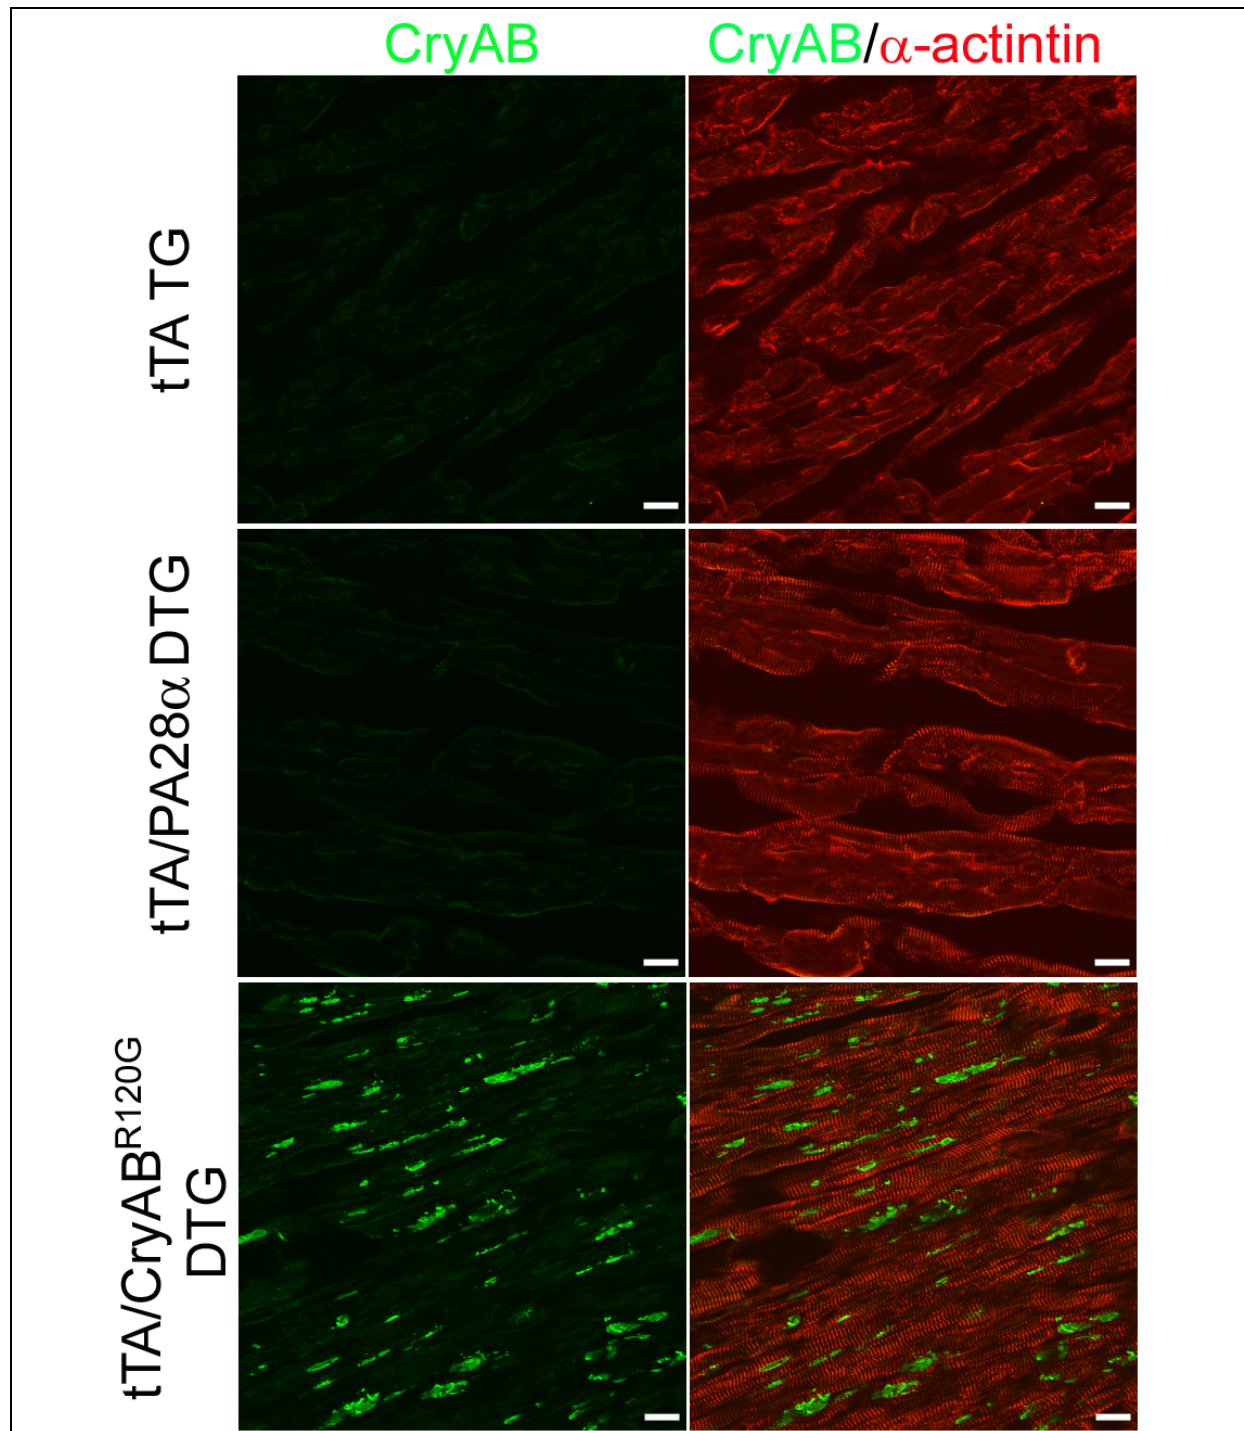

**Figure S5.** Confocal micrographs of double immunofluorescence staining for CryAB (green) and  $\alpha$ -actinin (red) in ventricular myocardium obtained from mice of the indicated genotypes. Note that CryAB positive protein aggregates are only detectable in CryAB<sup>R120G</sup> transgenic hearts. TG, transgenic; DTG, double TG; Scale bar = 20 $\mu$ m

Supplementary Table 1. Serial Echocardiographic analysis of mice

|                 | LVIDd       | LVPWd        | LVIDs       | LVPWs       | LVAWd       | LVAWs       | LVVd        | LVVs       | %EF         | % FS       | HR       |
|-----------------|-------------|--------------|-------------|-------------|-------------|-------------|-------------|------------|-------------|------------|----------|
| <b>2 month</b>  |             |              |             |             |             |             |             |            |             |            |          |
| NTG (n=10)      | 3.65 ± 0.34 | 0.81 ± 0.11  | 2.34 ± 0.35 | 1.24 ± 0.25 | 0.62 ± 0.07 | 1.09 ± 0.14 | 62.9 ± 11.8 | 22.2 ± 6.4 | 54.0 ± 11.8 | 38.2 ± 5.3 | 456 ± 34 |
| α-/tTA+ (n=9)   | 3.64 ± 0.26 | 0.72 ± 0.11  | 2.35 ± 0.28 | 1.19 ± 0.15 | 0.66 ± 0.09 | 1.06 ± 0.09 | 57.9 ± 8.6  | 20.3 ± 6.5 | 56.3 ± 12.6 | 39.7 ± 2.9 | 482 ± 53 |
| α+/tTA- (n=12)  | 3.64 ± 0.26 | 0.74 ± 0.115 | 2.32 ± 0.33 | 1.11 ± 0.17 | 0.65 ± 0.09 | 1.10 ± 0.10 | 57.0 ± 8.6  | 21.1 ± 3.9 | 52.1 ± 14.2 | 39.5 ± 6.1 | 465 ± 43 |
| α+/tTA+ (n=11)  | 3.71 ± 0.3  | 0.80 ± 0.12  | 2.36 ± 0.35 | 1.25 ± 0.20 | 0.67 ± 0.10 | 1.16 ± 0.20 | 63.2 ± 10.1 | 21.4 ± 3.0 | 56.9 ± 12.0 | 41.5 ± 6.5 | 477 ± 22 |
| <b>8 month</b>  |             |              |             |             |             |             |             |            |             |            |          |
| NTG (n=9)       | 3.88 ± 0.11 | 0.86 ± 0.15  | 2.43 ± 0.22 | 1.31 ± 0.12 | 0.85 ± 0.18 | 1.24 ± 0.16 | 65.2 ± 4.2  | 23.5 ± 4.6 | 64.2 ± 4.9  | 34.6 ± 5   | 512 ± 30 |
| α-/tTA+ (n=11)  | 3.78 ± 0.34 | 0.86 ± 0.10  | 2.58 ± 0.42 | 1.24 ± 0.25 | 0.81 ± 0.12 | 1.21 ± 0.18 | 61.8 ± 12.5 | 25.1 ± 8.5 | 60.6 ± 8.3  | 32.1 ± 6.1 | 502 ± 31 |
| α+/tTA- (n=9)   | 3.86 ± 0.19 | 0.89 ± 0.06  | 2.49 ± 0.16 | 1.34 ± 0.11 | 0.87 ± 0.12 | 1.30 ± 0.17 | 64.6 ± 7.4  | 22.2 ± 3.4 | 65.5 ± 3.8  | 35.5 ± 3.8 | 491 ± 45 |
| α+/tTA+ (n=11)  | 3.80 ± 0.26 | 0.86 ± 0.17  | 2.50 ± 0.28 | 1.24 ± 0.24 | 0.85 ± 0.14 | 1.20 ± 0.15 | 62.5 ± 10.1 | 25.5 ± 4.0 | 62.5 ± 6.8  | 33.4 ± 4.9 | 474 ± 37 |
| <b>12 month</b> |             |              |             |             |             |             |             |            |             |            |          |
| NTG (n=9)       | 3.97 ± 0.19 | 0.89 ± 0.23  | 2.77 ± 0.3  | 1.32 ± 0.25 | 0.84 ± 0.20 | 1.19 ± 0.21 | 68.9 ± 7.9  | 29.3 ± 6.1 | 57.7 ± 7.7  | 30.3 ± 5   | 482 ± 19 |
| α-/tTA+ (n=10)  | 3.83 ± 0.17 | 0.93 ± 0.18  | 2.57 ± 0.19 | 1.27 ± 0.21 | 0.82 ± 0.11 | 1.19 ± 0.18 | 63.2 ± 6.7  | 24.0 ± 4.5 | 60.7 ± 5.1  | 33.0 ± 3.4 | 493 ± 19 |
| α+/tTA- (n=11)  | 3.96 ± 0.34 | 0.92 ± 0.14  | 2.79 ± 0.35 | 1.28 ± 0.16 | 0.88 ± 0.14 | 1.26 ± 0.17 | 69.3 ± 13.4 | 29.9 ± 9.1 | 57.4 ± 7.2  | 29.9 ± 4.7 | 496 ± 34 |
| α+/tTA+ (n=13)  | 3.92 ± 0.20 | 0.86 ± 0.09  | 2.76 ± 0.18 | 1.17 ± 0.14 | 0.82 ± 0.11 | 1.14 ± 0.12 | 67.8 ± 9.2  | 28.3 ± 4.2 | 57.2 ± 4.2  | 30.2 ± 2.3 | 495 ± 17 |

α-/tTA+: PA28α NTG/tTA TG; α+/tTA-: PA28α TG/tTA NTG; α+/tTA+: PA28α TG/tTA TG; n: number of animals; LVIDd : Diastolic Left Ventricle Interdiameter; LVIDs: Systolic Left Ventricle Interdiameter; LVPWd: Diastolic Left Ventricle Posterior Wall; LVPWs: Systolic Left Ventricle Posterior Wall; LVAWd: Diastolic Left Ventricle Anterior Wall; LVAWs: Systolic Left Ventricle Anterior Wall; LVVd: Diastolic Left Ventricle Volume; LVVs: Systolic Left Ventricle Volume; EF: Ejection Fraction; FS: Fractional Shortening; HR: Heart Rate; Mean ±SD, One way ANOVA. No significant difference observed between groups at any time point.



Supplementary Table 2. Gravimetric measurements of 1-year old mice

|               | BW(g)      | HW(mg)       | HW/BW<br>(mg/g) | VW/BW<br>(mg/g) | LvW/BW<br>(mg/g) | RvW/BW<br>(mg/g) | LW/BW<br>(mg/g) | LiW/BW<br>(mg/g) | KW/BW<br>(mg/g) | HW/TL<br>(mg/g) |
|---------------|------------|--------------|-----------------|-----------------|------------------|------------------|-----------------|------------------|-----------------|-----------------|
| Ntg(n=6)      | 36.1 ± 6.0 | 135.7 ± 24.5 | 3.9 ± 0.2       | 3.4 ± 0.2       | 2.6 ± 0.1        | 0.8 ± 0.1        | 4.8 ± 0.8       | 39.7 ± 5.4       | 11.3 ± 0.8      | 7.3 ± 0.8       |
| α-/tTA+(n=8)  | 33.5 ± 4.7 | 141.1 ± 17.0 | 4.3 ± 0.5       | 3.9 ± 0.5       | 3.0 ± 0.4        | 0.8 ± 0.1        | 4.4 ± 0.5       | 43.3 ± 4.3       | 12.1 ± 1.5      | 7.7 ± 0.6       |
| α+/tTA-(n=7)  | 36.4 ± 4.2 | 143.1 ± 15.1 | 3.9 ± 0.2       | 3.5 ± 0.1       | 2.8 ± 0.2        | 0.8 ± 0.1        | 4.4 ± 0.5       | 43.3 ± 4.3       | 12.1 ± 1.5      | 7.7 ± 1.5       |
| α+/tTA+(n=11) | 36.3 ± 5.3 | 148.8 ± 20.5 | 4.1 ± 0.5       | 3.7 ± 0.4       | 2.8 ± 0.3        | 0.8 ± 0.1        | 4.7 ± 0.6       | 44.1 ± 3.9       | 11.9 ± 2.1      | 7.9 ± 1.1       |

α-/tTA+: PA28α NTG/tTA TG; α+/tTA-: PA28α TG/tTA NTG; α+/tTA+: PA28α TG/tTA TG; BW: Body Weight; HW: Heart Weight; VW: Ventricle Weight; TL: Tibia Length; LvW: Left ventricle Weight; RvW: Right ventricle Weight; LW: Lung Weight; LiW: Liver Weight; KW: kidney Weight; mean ±SD, One way ANOVA; no significant difference observed between groups.



**Supplementary Table 3. Echocardiographic Findings at 12 Weeks of Age**

|              | tTA<br>n=7       | tTA/mCryAB<br>n=13 | PA28 $\alpha$ /tTA/mCryAB<br>n=13 |
|--------------|------------------|--------------------|-----------------------------------|
| BW (g)       | 27.98 $\pm$ 2.92 | 30.56 $\pm$ 4.26   | 27.34 $\pm$ 4.40                  |
| HR (bpm)     | 474 $\pm$ 44     | 449 $\pm$ 34       | 479 $\pm$ 50                      |
| LVID;d (mm)  | 3.73 $\pm$ 0.2   | 3.89 $\pm$ 0.39    | 3.72 $\pm$ 0.25                   |
| LVPW;d (mm)  | 0.85 $\pm$ 0.14  | 1.05 $\pm$ 0.17*   | 0.90 $\pm$ 0.09†                  |
| LVID;s (mm)  | 2.56 $\pm$ 0.25  | 2.46 $\pm$ 0.41    | 2.24 $\pm$ 0.37                   |
| LVPW;s (mm)  | 1.17 $\pm$ 0.17  | 1.53 $\pm$ 0.21**  | 1.42 $\pm$ 0.13*                  |
| LVAW;d (mm)  | 0.78 $\pm$ 0.07  | 0.97 $\pm$ 0.10**  | 0.85 $\pm$ 0.09†                  |
| LVAW;s (mm)  | 1.12 $\pm$ 0.12  | 1.51 $\pm$ 0.14**  | 1.39 $\pm$ 0.12**†                |
| LV %EF       | 59.83 $\pm$ 7.66 | 66.69 $\pm$ 9.03   | 70.74 $\pm$ 8.84*                 |
| LV % FS      | 31.49 $\pm$ 5.53 | 36.85 $\pm$ 7.32   | 40.01 $\pm$ 7.53*                 |
| LV Mass (mg) | 86 $\pm$ 16      | 124 $\pm$ 19**     | 95 $\pm$ 16††                     |

\* P< 0.05 vs tTA; \*\* P< 0.001 vs tTA; † P<0.05 vs tTA/mCryAB; †† P<0.001 vs tTA/mCryAB; one way ANOVA and Holm-Sidak test.
